# Supplementary material for: Lysosomal-mediated waste clearance in retinal pigment epithelial cells is regulated by CRYBA1/βA3/A1-crystallin via V-ATPase-MTORC1 signaling
Source: PubMed Central journal article supplement — Autophagy. 2014 Jan 23;10(3):480–96. doi: 10.4161/auto.27292 (PMC4077886; doi:10.4161/auto.27292), 2014-01-23
Supplement: auto-10-480-s01.pdf [file auto-10-480-s01.pdf]

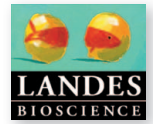

## **Supplemental Material to:**

**Mallika Valapala, Christine Wilson, Stacey Hose,  
Imran A Bhutto, Rhonda Grebe, Aling Dong,  
Seth Greenbaum, Limin Gu, Samhita Sengupta,  
Marisol Cano, Sean Hackett, Guotong Xu,  
Gerard A Luty, Lijin Dong, Yuri Sergeev, James T Handa,  
Peter Campochiaro, Eric Wawrousek, J Samuel Zigler, Jr,  
and Debasish Sinha**

**Lysosomal-mediated waste clearance in retinal pigment  
epithelial cells is regulated by CRYBA1/ $\beta$ A3/A1-crystallin  
via V-ATPase-MTORC1 signaling**

**Autophagy 2014; 10(3)**

**<http://dx.doi.org/10.4161/auto.27292>**

**[www.landesbioscience.com/journals/autophagy/article/27292](http://www.landesbioscience.com/journals/autophagy/article/27292)**

kDa

ATP6V0A1

50

IgGHc

Lumen

Membrane

IgG control

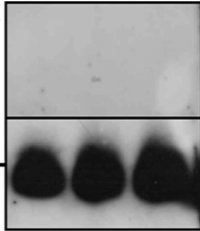

**Figure S1.** CRYBA1 antibody does not precipitate detectable ATP6V0A1 from cKO RPE.

Coimmunoprecipitation of lysosomal lumen and membrane extracts from *cryba1* cKO cells with CRYBA1 antibody and immunoblotting with V<sub>0</sub>-ATPase ATP6V0A1 antibody, demonstrating that the crystallin antibody does not pull down V<sub>0</sub>-ATPase ATP6V0A1 as there is no detectable band on the gel. Non-specific IgG was used as negative control.

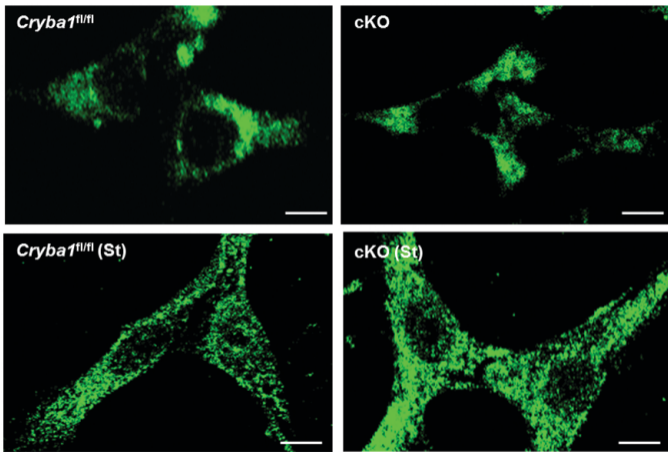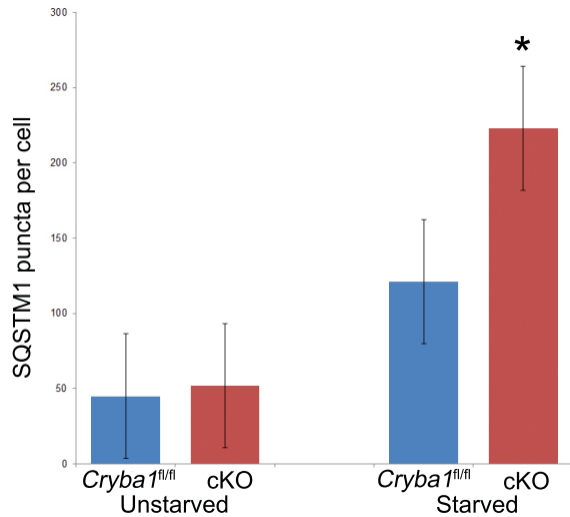

**Figure S2.** SQSTM1 is increased in cKO RPE following starvation. Levels of SQSTM1, an autophagy substrate, were assessed in primary cultures of *Cryba1*<sup>fl/fl</sup> and *cryba1* cKO RPE cells by immunofluorescence using a specific antibody. Fluorescence was increased in both cell types following autophagy induction (st), but there was increased accumulation of SQSTM1 in *cryba1* cKO cells relative to *Cryba1*<sup>fl/fl</sup> cells after autophagy induction (bottom panel). The number of SQSTM1 puncta was calculated from at least 30 cells per group. Data is represented as mean  $\pm$  S.E.M. \* $P < 0.05$ .
